# Supplementary material for: Machine learning enables improved runtime and precision for bio-loggers on seabirds
Source: PubMed Central journal article supplement (PMC7603325; doi:10.1038/s42003-020-01356-8), 2020-10-30
Supplement: 42003_2020_1356_MOESM3_ESM.pdf [file 42003_2020_1356_MOESM3_ESM.pdf]

## **Description of Additional Supplementary Files**

**File Name:** Supplementary Movie 1

**Description:** Intraspecific kleptoparasitism by a black-tailed gull. Video captured using AIOA of a black-tailed gull performing intraspecific kleptoparasitism while flying over the ocean near Aomori Prefecture, Japan.

**File Name:** Supplementary Movie 2

**Description:** Black-tailed gull foraging for fish. Video captured using AIOA of a black-tailed gull foraging for fish while flying over the ocean near Aomori Prefecture, Japan.

**File Name:** Supplementary Movie 3

**Description:** Black-tailed gull foraging for insects. Video captured using AIOA of a black-tailed gull foraging for insects while flying over the ocean near Aomori Prefecture, Japan.

**File Name:** Supplementary Movie 4

**Description:** Streaked shearwater group formation during area restricted search. Video captured using AIOA of a streaked shearwater participating in group formation while performing area restricted search over the ocean near Niigata Prefecture, Japan.

**File Name:** Supplementary Data 1

**Description:** Source data of Figs. 1, 2, and 3

**File Name:** Supplementary Software 1

**Description:** Code run on our bio-loggers, code to generate a low-cost decision tree, and hardware diagrams of the bio-loggers used in this study.
